# Supplementary material for: Identification of multiple gene-gene interactions for ordinal phenotypes
Source: PubMed Central journal article supplement (PMC3654913; doi:10.1186/1755-8794-6-s2-s9), 2013-05-07
Supplement: 1755-8794-6-S2-S9-S1.pdf [file 1755-8794-6-S2-S9-S1.pdf]

**Table S1.** Simulation settings based on 15 genetic models.  $OR_{j1}$  is presented as odd ratio of class  $j$  against class 1 for each two-locus genotype along with the corresponding penetrance ( $p_{j|i}$ ) in parentheses. Minor allele frequencies of 0.5 are used in models with patterns 1 and 2; MAFs of 0.3 are used in models with other patterns.

| Pattern 1 | Model 11                |                         | Model 12                |                         | Model 13                |                         |
|-----------|-------------------------|-------------------------|-------------------------|-------------------------|-------------------------|-------------------------|
| Genotype  | $OR_{21}$ ( $p_{2 i}$ ) | $OR_{31}$ ( $p_{3 i}$ ) | $OR_{21}$ ( $p_{2 i}$ ) | $OR_{31}$ ( $p_{3 i}$ ) | $OR_{21}$ ( $p_{2 i}$ ) | $OR_{31}$ ( $p_{3 i}$ ) |
| AABB      | 0.33 (0.233)            | 0.452 (0.239)           | 0.32 (0.178)            | 0.995 (0.410)           | 0.33 (0.202)            | 0.72 (0.334)            |
| AABb      | 10 (0.690)              | 5 (0.259)               | 3.04 (0.575)            | 2 (0.284)               | 2 (0.548)               | 1.2 (0.247)             |
| AAbb      | 0.4 (0.291)             | 0.3 (0.164)             | 0.61 (0.371)            | 0.38 (0.173)            | 0.8 (0.400)             | 0.6 (0.225)             |
| AaBB      | 10 (0.690)              | 5 (0.259)               | 3.04 (0.575)            | 2 (0.284)               | 2 (0.548)               | 1.2 (0.247)             |
| AaBb      | 0.4 (0.291)             | 0.3 (0.164)             | 0.61 (0.371)            | 0.38 (0.173)            | 0.8 (0.400)             | 0.6 (0.225)             |
| Aabb      | 5 (0.377)               | 10 (0.566)              | 2 (0.398)               | 3.04 (0.453)            | 1.2 (0.348)             | 2 (0.435)               |
| aaBB      | 0.3 (0.222)             | 0.4 (0.222)             | 0.38 (0.239)            | 0.61 (0.288)            | 0.6 (0.308)             | 0.8 (0.308)             |
| aaBb      | 5 (0.377)               | 10 (0.566)              | 2 (0.398)               | 3.04 (0.453)            | 1.2 (0.348)             | 2 (0.435)               |
| aabb      | 0.3 (0.222)             | 0.4 (0.222)             | 0.38 (0.239)            | 0.61 (0.288)            | 0.6 (0.308)             | 0.8 (0.308)             |
| Pattern 2 | Model 21                |                         | Model 22                |                         | Model 23                |                         |
| Genotype  | $OR_{21}$ ( $p_{2 i}$ ) | $OR_{31}$ ( $p_{3 i}$ ) | $OR_{21}$ ( $p_{2 i}$ ) | $OR_{31}$ ( $p_{3 i}$ ) | $OR_{21}$ ( $p_{2 i}$ ) | $OR_{31}$ ( $p_{3 i}$ ) |
| AABB      | 0.7 (0.338)             | 0.83 (0.299)            | 0.14 (0.098)            | 0.76 (0.388)            | 0.28 (0.243)            | 0.15 (0.098)            |
| AABb      | 0.6 (0.364)             | 0.4 (0.182)             | 0.7 (0.384)             | 0.5 (0.205)             | 0.9 (0.414)             | 0.7 (0.241)             |
| AAbb      | 8 (0.640)               | 5 (0.300)               | 5 (0.625)               | 3 (0.281)               | 3 (0.645)               | 1.2 (0.194)             |
| AaBB      | 0.6 (0.364)             | 0.4 (0.182)             | 0.7 (0.384)             | 0.5 (0.205)             | 0.9 (0.414)             | 0.7 (0.241)             |
| AaBb      | 5 (0.377)               | 10 (0.566)              | 3 (0.400)               | 5 (0.500)               | 1.2 (0.286)             | 3 (0.536)               |
| Aabb      | 0.6 (0.364)             | 0.4 (0.182)             | 0.7 (0.384)             | 0.5 (0.205)             | 0.9 (0.414)             | 0.7 (0.241)             |
| aaBB      | 8 (0.640)               | 5 (0.300)               | 5 (0.625)               | 3 (0.281)               | 3 (0.645)               | 1.2 (0.194)             |
| aaBb      | 0.6 (0.364)             | 0.4 (0.182)             | 0.7 (0.384)             | 0.5 (0.205)             | 0.9 (0.414)             | 0.7 (0.241)             |
| aabb      | 0.6 (0.364)             | 0.4 (0.182)             | 0.7 (0.384)             | 0.5 (0.205)             | 0.9 (0.414)             | 0.7 (0.241)             |
| Pattern 3 | Model 31                |                         | Model 32                |                         | Model 33                |                         |
| Genotype  | $OR_{21}$ ( $p_{2 i}$ ) | $OR_{31}$ ( $p_{3 i}$ ) | $OR_{21}$ ( $p_{2 i}$ ) | $OR_{31}$ ( $p_{3 i}$ ) | $OR_{21}$ ( $p_{2 i}$ ) | $OR_{31}$ ( $p_{3 i}$ ) |
| AABB      | 3.27 (0.659)            | 1.25 (0.189)            | 2.28 (0.543)            | 1.56 (0.278)            | 1.15 (0.441)            | 0.94 (0.271)            |
| AABb      | 1.5 (0.250)             | 5 (0.625)               | 1.2 (0.286)             | 3 (0.536)               | 1.2 (0.348)             | 2 (0.435)               |
| AAbb      | 0.2 (0.170)             | 0.3 (0.191)             | 0.2 (0.170)             | 0.3 (0.191)             | 0.2 (0.170)             | 0.3 (0.191)             |
| AaBB      | 4 (0.640)               | 2 (0.240)               | 3 (0.645)               | 1.2 (0.194)             | 2 (0.548)               | 1.2 (0.247)             |
| AaBb      | 0.1 (0.108)             | 0.1 (0.081)             | 0.2 (0.182)             | 0.2 (0.136)             | 0.5 (0.308)             | 0.5 (0.231)             |
| Aabb      | 1.5 (0.250)             | 5 (0.625)               | 1.2 (0.286)             | 3 (0.536)               | 1.2 (0.348)             | 2 (0.435)               |
| aaBB      | 0.3 (0.250)             | 0.2 (0.125)             | 0.5 (0.323)             | 0.3 (0.194)             | 0.9 (0.414)             | 0.7 (0.241)             |
| aaBb      | 1.5 (0.250)             | 1.5 (0.625)             | 1.2 (0.286)             | 3 (0.536)               | 1.2 (0.348)             | 2 (0.435)               |
| aabb      | 0.3 (0.250)             | 0.2 (0.125)             | 0.5 (0.323)             | 0.3 (0.194)             | 0.9 (0.414)             | 0.7 (0.241)             |
| Pattern 4 | Model 41                |                         | Model 42                |                         | Model 43                |                         |
| Genotype  | $OR_{21}$ ( $p_{2 i}$ ) | $OR_{31}$ ( $p_{3 i}$ ) | $OR_{21}$ ( $p_{2 i}$ ) | $OR_{31}$ ( $p_{3 i}$ ) | $OR_{21}$ ( $p_{2 i}$ ) | $OR_{31}$ ( $p_{3 i}$ ) |
| AABB      | 0.67 (0.319)            | 0.91 (0.325)            | 0.54 (0.320)            | 0.54 (0.240)            | 0.77 (0.375)            | 0.7 (0.258)             |
| AABb      | 0.6 (0.348)             | 0.5 (0.217)             | 0.8 (0.372)             | 0.8 (0.279)             | 0.9 (0.387)             | 0.9 (0.290)             |
| AAbb      | 6 (0.615)               | 4 (0.308)               | 3 (0.571)               | 2 (0.286)               | 1.5 (0.476)             | 1.2 (0.286)             |
| AaBB      | 0.5 (0.308)             | 0.5 (0.231)             | 0.8 (0.372)             | 0.8 (0.279)             | 0.9 (0.387)             | 0.9 (0.290)             |
| AaBb      | 6 (0.615)               | 4 (0.308)               | 3 (0.571)               | 2 (0.286)               | 1.5 (0.476)             | 1.2 (0.286)             |
| Aabb      | 3 (0.377)               | 8 (0.615)               | 1.2 (0.211)             | 5 (0.658)               | 1.2 (0.286)             | 3 (0.536)               |
| aaBB      | 6 (0.615)               | 4 (0.308)               | 3 (0.571)               | 2 (0.286)               | 1.5 (0.476)             | 1.2 (0.286)             |
| aaBb      | 3 (0.377)               | 8 (0.615)               | 1.2 (0.211)             | 5 (0.658)               | 1.2 (0.286)             | 3 (0.536)               |
| aabb      | 0.5 (0.308)             | 0.5 (0.231)             | 0.8 (0.372)             | 0.8 (0.279)             | 0.9 (0.387)             | 0.9 (0.290)             |
| Pattern 5 | Model 51                |                         | Model 52                |                         | Model 53                |                         |
| Genotype  | $OR_{21}$ ( $p_{2 i}$ ) | $OR_{31}$ ( $p_{3 i}$ ) | $OR_{21}$ ( $p_{2 i}$ ) | $OR_{31}$ ( $p_{3 i}$ ) | $OR_{21}$ ( $p_{2 i}$ ) | $OR_{31}$ ( $p_{3 i}$ ) |
| AABB      | 0.01 (0.009)            | 0.15 (0.128)            | 0.11 (0.101)            | 0.26 (0.184)            | 0.46 (0.280)            | 0.58 (0.265)            |
| AABb      | 6 (0.615)               | 4 (0.308)               | 3 (0.571)               | 2 (0.286)               | 1.5 (0.476)             | 1.2 (0.286)             |
| AAbb      | 0.6 (0.364)             | 0.4 (0.182)             | 0.9 (0.414)             | 0.7 (0.241)             | 0.9 (0.400)             | 0.8 (0.267)             |
| AaBB      | 6 (0.615)               | 4 (0.308)               | 3 (0.571)               | 2 (0.286)               | 1.5 (0.476)             | 1.2 (0.286)             |
| AaBb      | 4 (0.432)               | 6 (0.486)               | 2 (0.400)               | 3 (0.450)               | 1.2 (0.390)             | 1.5 (0.366)             |
| Aabb      | 4 (0.432)               | 6 (0.486)               | 2 (0.400)               | 3 (0.450)               | 1.2 (0.390)             | 1.5 (0.366)             |
| aaBB      | 0.6 (0.364)             | 0.4 (0.182)             | 0.9 (0.414)             | 0.7 (0.241)             | 0.9 (0.400)             | 0.8 (0.267)             |
| aaBb      | 4 (0.432)               | 6 (0.486)               | 2 (0.400)               | 3 (0.450)               | 1.2 (0.390)             | 1.5 (0.366)             |
| aabb      | 4 (0.432)               | 6 (0.486)               | 2 (0.400)               | 3 (0.450)               | 1.2 (0.390)             | 1.5 (0.366)             |
